# Supplementary material for: Evaluation of epigenetic modulation of cyclooxygenase-2 as a prognostic marker for hepatocellular carcinoma
Source: PubMed Central journal article supplement — Oncogenesis. 2012 Jul 9;1(7):e23–. doi: 10.1038/oncsis.2012.23 (PMC3412654; doi:10.1038/oncsis.2012.23), 2012-07-09

**Supplementary Table 1 - Primers for Pyrosequencing**

|                                          | Forward                            | Reverse                               |
|------------------------------------------|------------------------------------|---------------------------------------|
| 1st/2nd<br>CpG Island<br>First Step      | AGTTATGTATGTATGTGTTGTATATAGAGT     | AAAAAATAATCCCCACTCTCCTATC             |
| 1st/2nd<br>CpG Island<br>Second<br>Step  | [Btn]TATATAGAGTAGATATATAGTTTATTAAG | CTATCTAATCCCTCCCTCTC                  |
| 1st/2nd<br>CpG Island<br>Sequencing<br>A | -----                              | CTTCCTCTCCAAAAATCTAA                  |
| 1st/2nd<br>CpG Island<br>Sequencing<br>B | -----                              | TTTCTTCTTCCCAATCTTTACC                |
| 1st/2nd<br>CpG Island<br>Sequencing<br>C | -----                              | CCTCTCCTCCCCCAATTCCA                  |
| 1st/2nd<br>CpG Island<br>Sequencing<br>D | -----                              | CCAAATATCTTTTCTTCT                    |
| 3rd CpG<br>Island<br>First Step          | GAGGTGAGAGTGTTTTAGAT               | CATAAACTTAATTTTCAATCTTAT              |
| 3rd CpG<br>Island<br>Second<br>Step      | GTTTATAATGATTAGTGTTTGTGGGAAAG      | [Btn]<br>AACCAAACCCCTCAAACAACAAAACCTA |
| 3rd CpG<br>Island<br>Sequencing<br>A     | AGGTTAGAGAGGAAATTTTG               | -----                                 |
| 3rd CpG<br>Island<br>Sequencing<br>B     | GGTTGAGAGTTAGGAT                   | -----                                 |

**Supplementary Table 2 - Primers for methylation-sensitive restriction assay (MSRA)**

|               | Forward                 | Reverse               |
|---------------|-------------------------|-----------------------|
| CpG -431      | CTTAACCTTACTCGCCCCAGTCT | AGAAGGACACTTGGCTTCCTC |
| CpG -372      | GGAAGCCAAGTGTCTTCTGC    | GGCAGGGTTTTTTACCCAC   |
| CpG -138      | AGCTTCCTGGGTTTCCGATT    | CCCCACAAATTTTTCCCTC   |
| CpG +75/84/98 | GCCCTCAGACAGCAAAGCCTA   | GGGAAAGCTGGAATATCCACG |

**Supplementary Table 3 - Primers for Chromatin immunoprecipitation**

|                   | Forward                | Reverse               |
|-------------------|------------------------|-----------------------|
| Distal Promoter   | GGAAGCCAAGTGCCTTCTGC   | TGATCGCCTTGGATGGGATA  |
| Proximal Promoter | AGCTTCCTGGGTTTCCGATT   | GGGCAGGGTTTTTTACCCAC  |
| First Exon        | CTCGGTTAGCGACCAATTGTC  | CGTGCTCCTGACGCTCACT   |
| First intron      | AGCTTGGACCGCTAGAGTTTCG | GGGAAAGCTGGAATATCCACG |

**Figure. S1- Expression of COX-2 increases after treatment of HCC cells with HDAC inhibitors.** Eight hours before the experiment HCC cells were change to 1% FBS and they were incubated without (white bars) or with 2.5 mM NaB or 2.5  $\mu$ M SAHA for 16 h. Total RNA was then isolated and mRNA levels for COX-2 and the internal control 18S were determined by qPCR. COX-2 mRNA amounts were calculated as RQ and normalized to the expression of ribosomal levels. Values represent fold change relative to each cell line without treatment. Data are reported as means  $\pm$  SD of three independent experiments. \*\* $p < 0.01$  and \* $p < 0.05$

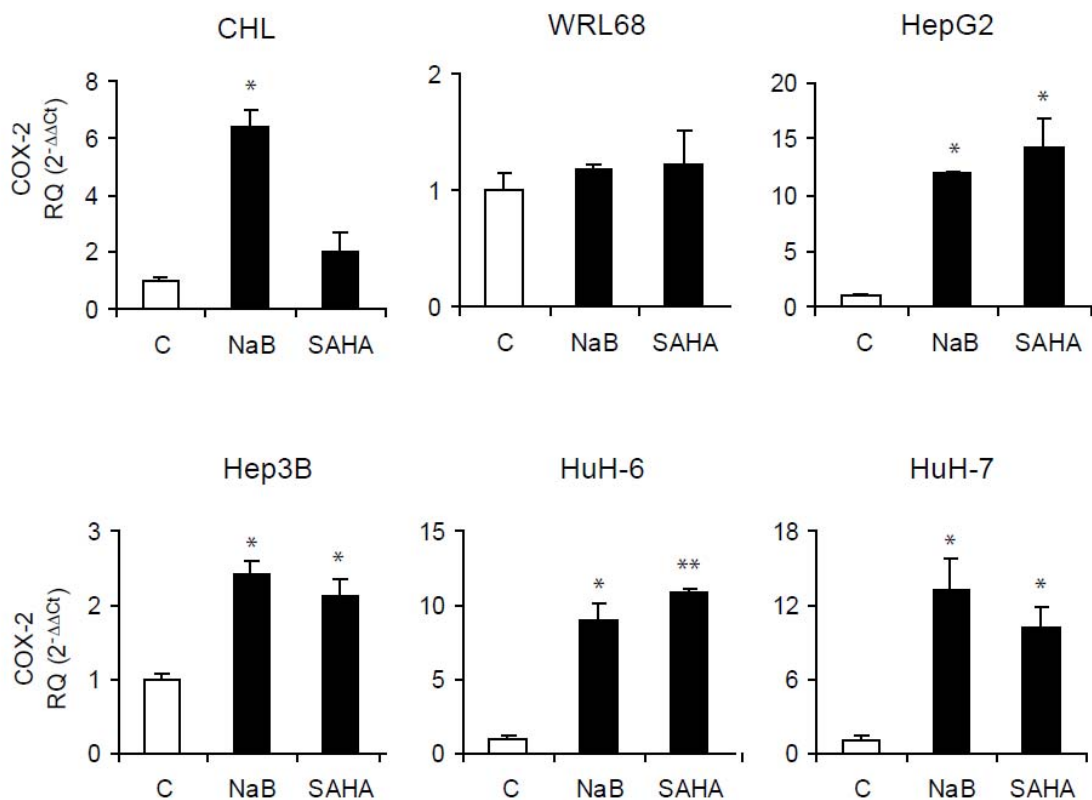

**Figure. S2- Synergistic effect of HDAC inhibitors and AzadC on COX-2 expression.**

(A) HCC cells in 1% FBS were incubated without (white) or with 5  $\mu$ M AzadC and 2.5 mM NaB (A+N, grey) or AzadC and 2.5  $\mu$ M SAHA (A+S, black) for 48 h. Cellular extracts were prepared and protein was analyzed by Western blot. A representative Western blot analyzing COX-2 and DNMT1 protein levels is shown. The expression of target proteins was normalized to GAPDH. Each panel has an optimal exposition time. Densitometric analysis of COX-2 and DNMT1 protein levels is shown. Results are expressed as arbitrary units. (B) PGE<sub>2</sub> concentration was determined by enzyme immunoassay in the supernatant of the cells. Data are expressed as means  $\pm$  SD of three independent experiments. \* $p < 0.05$  vs. the corresponding cell line without treatment

A

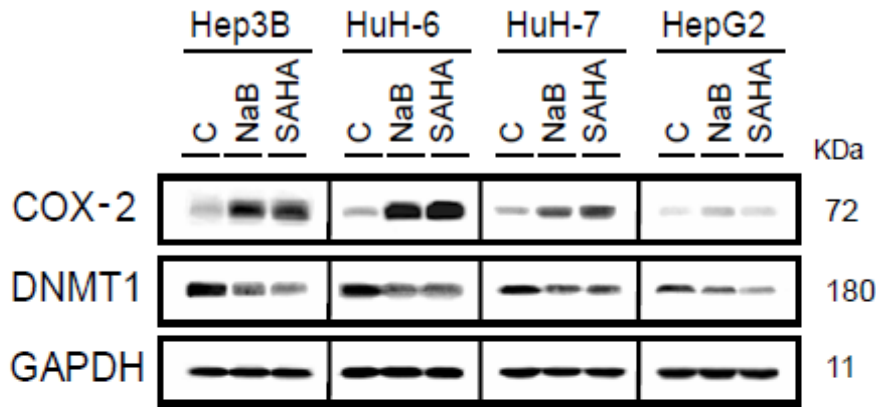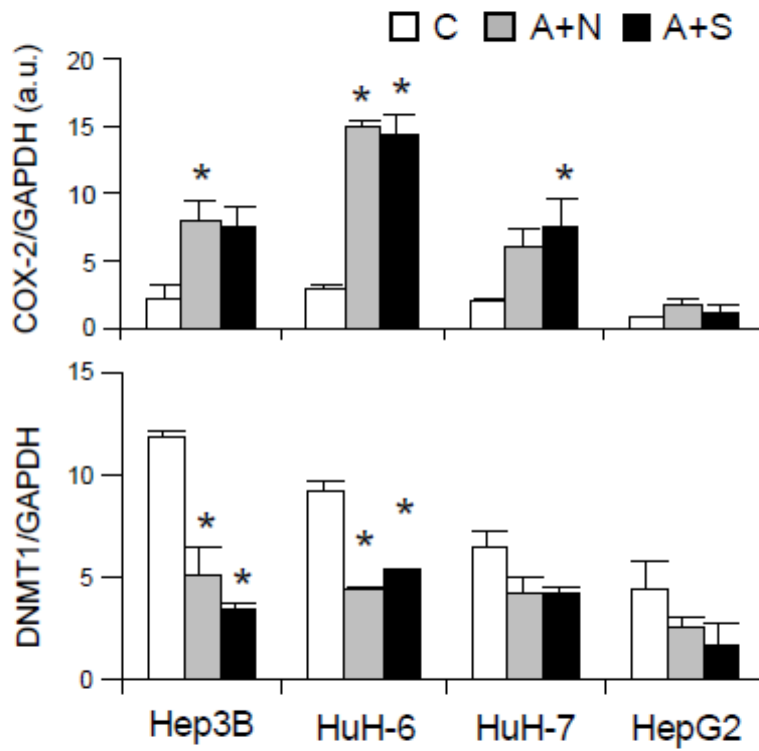

B

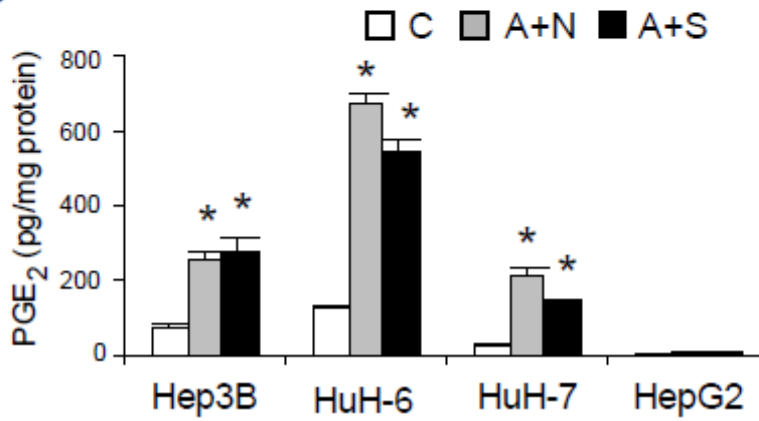

Supplement: oncsis201223x1.pdf [file oncsis201223x1.pdf]
